# Supplementary material for: Genome Editing to Generate Sake Yeast Strains with Eight Mutations That Confer Excellent Brewing Characteristics
Source: Cells. 2021 May 24;10(6):1299. doi: 10.3390/cells10061299 (PMC8225151; doi:10.3390/cells10061299)
Supplement: Supplementary file 1 [file cells-10-01299-s001.zip › Supplementary Tables.xlsx]

## Sheet: Table S1
Table S1. Oligonucleotides used as genome editing tools
Name	Sequence (5’ to 3’)	Direction
AWA1 donor sense	TTTTGTGGTTCTCAAGTCAGTAACAACAAATACCCATCGTTGATTCTTTTTGGTAAGATCTTGCCTGTCAAAGAGTTTTTTTAACTGAGGAATTAAAAGTTTATTCCTCTGAAACGAGATAGGTTCTTAATATGCATTTTATATACGCTT	sense
AWA1 donor antisense	AAGCGTATATAAAATGCATATTAAGAACCTATCTCGTTTCAGAGGAATAAACTTTTAATTCCTCAGTTAAAAAAACTCTTTGACAGGCAAGATCTTACCAAAAAGAATCAACGATGGGTATTTGTTGTTACTGACTTGAGAACCACAAAA	antisense
CAR1 donor sense	TGGTCTGTATATGTTTTCTCAAAGTTAGCAGAAACAACAACAACAACTATATCAATAACAATAACTACTATCAAGTTTATATCATCATCCCTTTTATCAAAATAAGCATTCTCTTTTTATTTTAGTTAAGCACATGCATACATAAATTTA	sense
CAR1 donor antisense	TAAATTTATGTATGCATGTGCTTAACTAAAATAAAAAGAGAATGCTTATTTTGATAAAAGGGATGATGATATAAACTTGATAGTAGTTATTGTTATTGATATAGTTGTTGTTGTTGTTTCTGCTAACTTTGAGAAAACATATACAGACCA	antisense
MDE1 donor sense	CAAAGCAGCTAGCTGTTCATCAAGATATGTAACGTTTTTAAGCACTGAACTAACAAGGGGAGCCAGTGAACGACTCGGGTTAATGCTTAAATTTATTGTATGATTTATATACTTCTATACATGGTATTATTATTATTATTATTATTATTA	sense
MDE1 donor antisense	TAATAATAATAATAATAATAATAATACCATGTATAGAAGTATATAAATCATACAATAAATTTAAGCATTAACCCGAGTCGTTCACTGGCTCCCCTTGTTAGTTCAGTGCTTAAAAACGTTACATATCTTGATGAACAGCTAGCTGCTTTG	antisense
FAS2 donor sense	CATCTGGTATCACCGACCCATACGAAATGTACAAATACGTACATGTTTCTGAGGTTGGTAACTGTTCTGGTTCTTCTATGGGTGGTGTTTCTGCCTTACGTGGTATGTTTAAGGACCGTTTCAAGGATGAGCCTGTCCAAAATGATATTT	sense
FAS2 donor antisense	AAATATCATTTTGGACAGGCTCATCCTTGAAACGGTCCTTAAACATACCACGTAAGGCAGAAACACCACCCATAGAAGAACCAGAACAGTTACCAACCTCAGAAACATGTACGTATTTGTACATTTCGTATGGGTCGGTGATACCAGATG	antisense
Red letters in FAS2 donor indicate bases after mutagenesis

## Sheet: Table S2
Table S2. Oligonucleotides used for polymerase chain reaction
Primer name	Sequence (5’ to 3’)	Direction
K7 AWA1 F	TGGTGCTAGGCCCTGTGTTGTG	sense
K7 AWA1 R	TGGCCTGAACGATTTTACTGTGGA	antisense
K7 CAR1 F	GGTGCAATCCCTGACTCATCAATG	sense
K7 CAR1 R	ATTTTAAAGGCCCCACGGTTGG	antisense
K7 MDE1 F	TGCTGATACTGTGGGTATTGTTGTG	sense
K7 MDE1 R	GCAGAAAATGATGACAGTCTAGCTC	antisense
K7 FAS2 check F	AACTGTTCTGGTTCTGG	sense
K7 FAS2 mutation check F	AACTGTTCTGGTTCTTC	sense
K7 FAS2 R	TCGTAACCACCGACAATACAGATTC	antisense

## Sheet: Table S3
Table S3. Comparison of the whole-genome sequences of genome-edited sake strains
Strain 1)	Chromsome	Physical position	Gene	Zygosity	Allele freq 2)	Changed amino acid residues 3)
K7GE21, K7GE31, K7GE41	XIV	166082	NRD1	Hetero	G:C=0.49:0.51	N*532K
K7GE31, K7GE41	X	522984	PTK2	Homo	G:C=0.00:1.00	Q162H*
	X	551722	HOC1	Homo	A:T=0.00:1.00	N*345Y
	X	559745	ACF4	Homo	C:T=0.00:1.00	D*168N
	X	559945	ACF4	Homo	T:C=0.00:1.00	N101S*
	X	560156	ACF4	Homo	A:G=0.00:1.00	S31P*
	X	561607	CSN12	Homo	G:T=0.00:1.00	C*389F
	X	570421	GRR1	Homo	G:A=0.00:1.00	H*204Y
1) Comparison with parent sequence (K7). Only missense variant is shown.
2) Parent sequence (K7) : Strain sequence
3) Amino acid residue in S288C is marked with asterisk.

## Sheet: Table S4
Table S4. The morphological changes at each step detected by likelihood ratio test (FDR = 0.01)
No	model	equalVar	ID	Z	P	-log10P	Q	Description
1	K7vsK7GE01	TRUE	ACV120_C	-6.44582	2.27e-05	4.64397	0.00199632	Noise_of_total_length_of_actin_patch_link
2	K7vsK7GE01	TRUE	DCV127_A	-5.61291	8.44675e-05	4.07331	0.00435455	Noise_of_distance_between_nuclear_brightest_point_and_cell_tip
3	K7vsK7GE01	FALSE	C126_C	5.61429	0.000105084	3.97846	0.00506787	Brightness_difference_of_cell_wall
4	K7GE01vsK7GE21	TRUE	DCV154_C	6.70046	0.000101365	3.99411	0.00505148	Noise_of_angle_between_C1D1-1_and_C1C1-2
5	K7GE21vsK7GE31	TRUE	ACV7-1_A	9.01826	1.11526e-05	4.95262	0.00128258	Noise_of_size_of_actin_region
6	K7GE21vsK7GE31	TRUE	DCV182_A	-6.04118	0.000211322	3.67506	0.00789835	Noise_of_nuclear_axis_ratio
7	K7GE31vsK7GE41	FALSE	D203	2.68359	0	#NUM!	0	Nuclear_D_ratio
8	K7GE31vsK7GE41	FALSE	A113_A	1.12265	6.4348e-205	204.191	4.81014e-202	Actin_n_ratio
9	K7GE31vsK7GE41	FALSE	A106_A	-6.16877	3.78022e-10	9.42248	1.88386e-07	Actin_b_ratio
10	K7GE31vsK7GE41	FALSE	A114	5.83345	3.41456e-09	8.46666	1.02098e-06	Actin_a_ratio_to_no_bud_cells
11	K7GE31vsK7GE41	FALSE	A115	-5.83345	3.41456e-09	8.46666	1.02098e-06	Actin_b_ratio_to_no_bud_cells
12	K7GE31vsK7GE41	FALSE	D212	5.28063	5.47006e-08	7.26201	1.36299e-05	Nuclear_B_ratio_to_nuclear_AA1BC_cells
13	K7GE31vsK7GE41	FALSE	A105_A	5.30175	9.20859e-08	7.03581	1.96674e-05	Actin_a_ratio
14	K7GE31vsK7GE41	FALSE	D201	4.56724	2.70646e-06	5.5676	0.000505783	Nuclear_B_ratio
15	K7GE31vsK7GE41	FALSE	D215	4.52738	3.3751e-06	5.47171	0.000560655	Nuclear_B_ratio_to_nuclear_A1BC_cells
16	K7GE31vsK7GE41	TRUE	DCV147_C	10.0477	4.85898e-06	5.31345	0.000726436	Noise_of_relative_distance_of_nuclear_gravity_center_in_mother_to_mother_center
17	K7GE31vsK7GE41	TRUE	C126_C	-9.74918	6.13413e-06	5.21225	0.000833704	Brightness_difference_of_cell_wall
18	K7GE31vsK7GE41	TRUE	DCV117_C	9.11071	1.03171e-05	4.98644	0.00128258	Noise_of_distance_between_nuclear_gravity_center_in_mother_and_mother_center
19	K7GE31vsK7GE41	TRUE	CCV104_A	8.8321	1.30732e-05	4.88362	0.00133292	Noise_of_short_axis_length_in_whole_cell
20	K7GE31vsK7GE41	FALSE	C118_C	-9.22154	1.33735e-05	4.87376	0.00133292	Cell_size_ratio
21	K7GE31vsK7GE41	FALSE	C117_C	-8.97501	1.95069e-05	4.70981	0.00182272	Cell_outline_ratio
22	K7GE31vsK7GE41	TRUE	CCV102_C	8.07331	2.57588e-05	4.58907	0.00213946	Noise_of_whole_cell_outline_length
23	K7GE31vsK7GE41	TRUE	CCV101_C	7.96578	2.84771e-05	4.5455	0.00224076	Noise_of_whole_cell_size
24	K7GE31vsK7GE41	TRUE	ACV121_A1B	7.75541	3.47646e-05	4.45886	0.00259872	Noise_of_maximal_distance_between_patches
25	K7GE31vsK7GE41	TRUE	C126_A1B	-7.48552	4.51967e-05	4.34489	0.00314483	Brightness_difference_of_cell_wall
26	K7GE31vsK7GE41	TRUE	C109_C	7.44535	4.70265e-05	4.32766	0.00314483	Neck_width
27	K7GE31vsK7GE41	TRUE	C11-1_C	7.40099	4.91437e-05	4.30853	0.00314483	Mother_cell_size
28	K7GE31vsK7GE41	TRUE	D145_C	7.37399	5.04842e-05	4.29684	0.00314483	Distance_between_nuclear_outline_point_D7_in_mother_and_mother_hip
29	K7GE31vsK7GE41	TRUE	C104_C	7.12611	6.48639e-05	4.188	0.00387896	Short_axis_length_in_mother
30	K7GE31vsK7GE41	TRUE	ACV120_A1B	7.07953	6.80431e-05	4.16722	0.00391258	Noise_of_total_length_of_actin_patch_link
31	K7GE31vsK7GE41	TRUE	CCV11-1_A	6.99649	7.41465e-05	4.12991	0.00410562	Noise_of_whole_cell_size
32	K7GE31vsK7GE41	TRUE	D125_C	6.94042	7.86101e-05	4.10452	0.00419733	Distance_between_nuclear_gravity_center_in_mother_and_mother_hip
33	K7GE31vsK7GE41	TRUE	DCV17-1_A	6.61352	0.000111332	3.95338	0.00520141	Noise_of_nuclear_fitness_for_ellipse
34	K7GE31vsK7GE41	FALSE	D208	3.7268	0.000136678	3.8643	0.0061921	Nuclear_B_ratio_to_budded_cells
35	K7GE31vsK7GE41	TRUE	C12-1_C	6.36802	0.000145815	3.8362	0.00635666	Mother_cell_outline_length
36	K7GE31vsK7GE41	TRUE	D112_C	-6.34386	0.000148814	3.82735	0.00635666	Ratio_of_D108_to_C128
37	K7GE31vsK7GE41	TRUE	C103_C	6.29812	0.000157675	3.80224	0.00654805	Long_axis_length_in_mother
38	K7GE31vsK7GE41	TRUE	C116_A1B	-6.13831	0.000188984	3.72357	0.00763618	Axis_ratio_ratio
39	K7GE31vsK7GE41	TRUE	C114_A1B	-6.10786	0.000195694	3.70842	0.00769923	Bud_axis_ratio
40	K7GE31vsK7GE41	TRUE	A103_A1B	5.8513	0.000205485	3.68722	0.00787714	Relative_distance_of_actin_patch_center_from_neck_in_mother
